# Supplementary material for: Diethylcarbamazine elicits calcium signals by activation of Brugia malayi TRP-2b channels heterologously expressed in HEK293 cells
Source: Research Square preprint supplement (doi:10.21203/rs.3.rs-7359086/v1), 2025-09-08
Supplement: Supplementary file 1 [file 601ae2abce9c98eb69812b3d.docx]

| **Gene** | **Forward Primer** | **Reverse Primer** |
| --- | --- | --- |
| *Bma-trp-2b* (Bm526b) SSK160 | GGCGAATTCGGATCCATGAGGAAATTCACACAAGATGC | CTCCGCTTCCGGTACCCTTAAATGGTGGATCTTCTTGATAA |
| *Bma-trp-2b* screening | AAGAAGTACGTGGACCACCA | TCGAAGTGCAACGGTACATA |
| *htrp-1* U31110 (TRPC1) | GATTTTGGAAAATTTCTTGGGATGT | TTTGTCTTCATGATTTGCTATCA |
| *htrp-3* U47050 (TRPC3) | GACATATTCAAGTTCATGGTCCTC | ACATCACTGTCATCCTCAATTTC |
| *htrp-4* AF063822 (TRPC4) | CTGCAAATATCTCTGGGAAGA | GCTTTGTTCGTGCAAATTTCC |
| *htrp-6* AF080394 (TRPC6) | GACATCTTCAAGTTCATGGTCATA | ATCAGCGTCATCCTCAATTTC |
| *hβ-actin* J00068 | GCTACCCGCCCAGAAACTAGACAC | CCAGTTGGTGATGATGCCGTGCT |
