# Supplementary material for: Diethylcarbamazine elicits calcium signals by activation of Brugia malayi TRP-2b channels heterologously expressed in HEK293 cells
Source: Research Square preprint supplement (doi:10.21203/rs.3.rs-7359086/v1), 2025-09-08
Supplement: Supplementary file 1 [file 1919876889a023cf77fb2d7a.pdf]

**FIG. S1**

**A**

Non-transfected

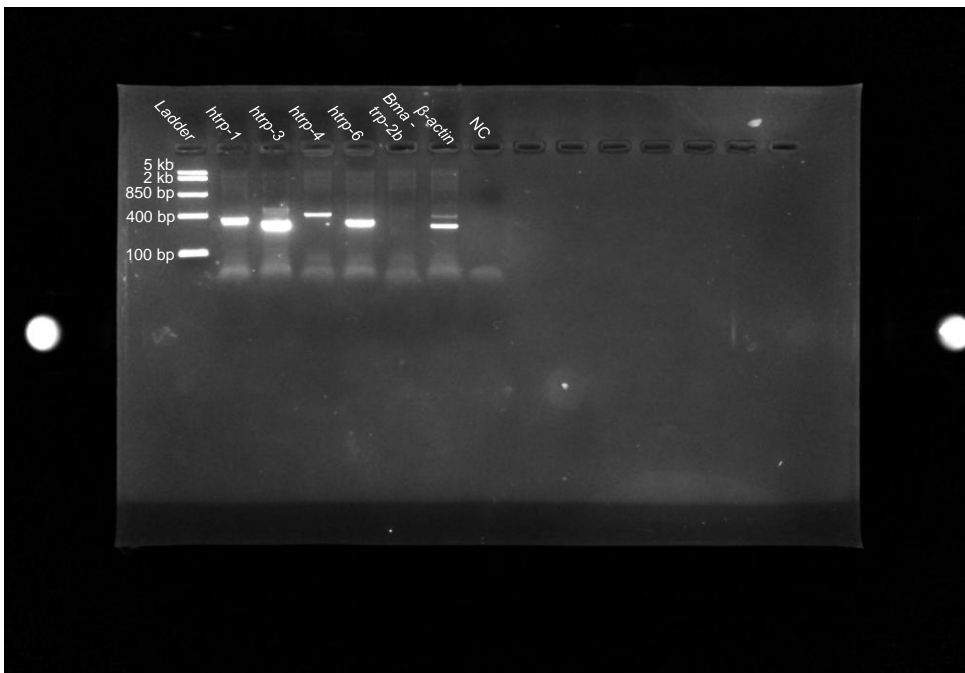

**B**

*Bma-trp-2* transfected

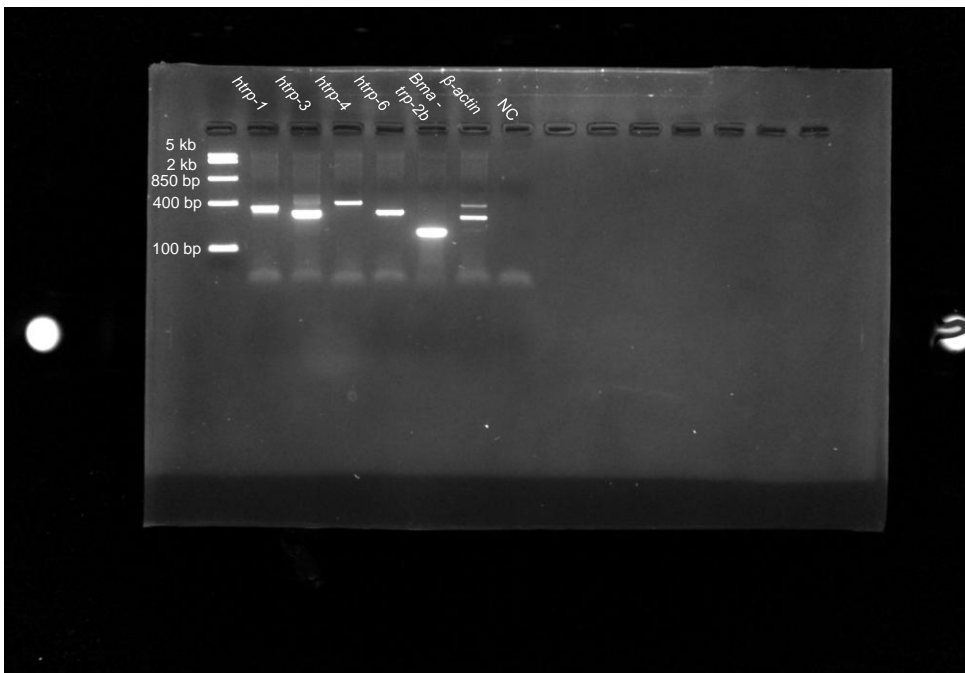

**Supplementary Figure 1: Presence of endogenous TRPC channels and detection of *Bma-trp-2b* in HEK293 cells.**

Original uncropped gel pictures from Fig. 1 showing RT-PCR analysis of endogenously expressed TRPC channels (*htp-1*, *htp-3*, *htp-4* & *htp-6*) and *Bma-trp-2b* in non-transfected HEK293 cells (A) and transfected cells (B). Human  $\beta$ -actin was used as a positive control. N.C. = negative control, no cDNA template present. Ladder = FastRuler Middle Range DNA Ladder. Each lane represents one of the TRPC genes. Images were taken under UV light with an exposure setting of 3 seconds per 1 frame.

**FIG. S2**

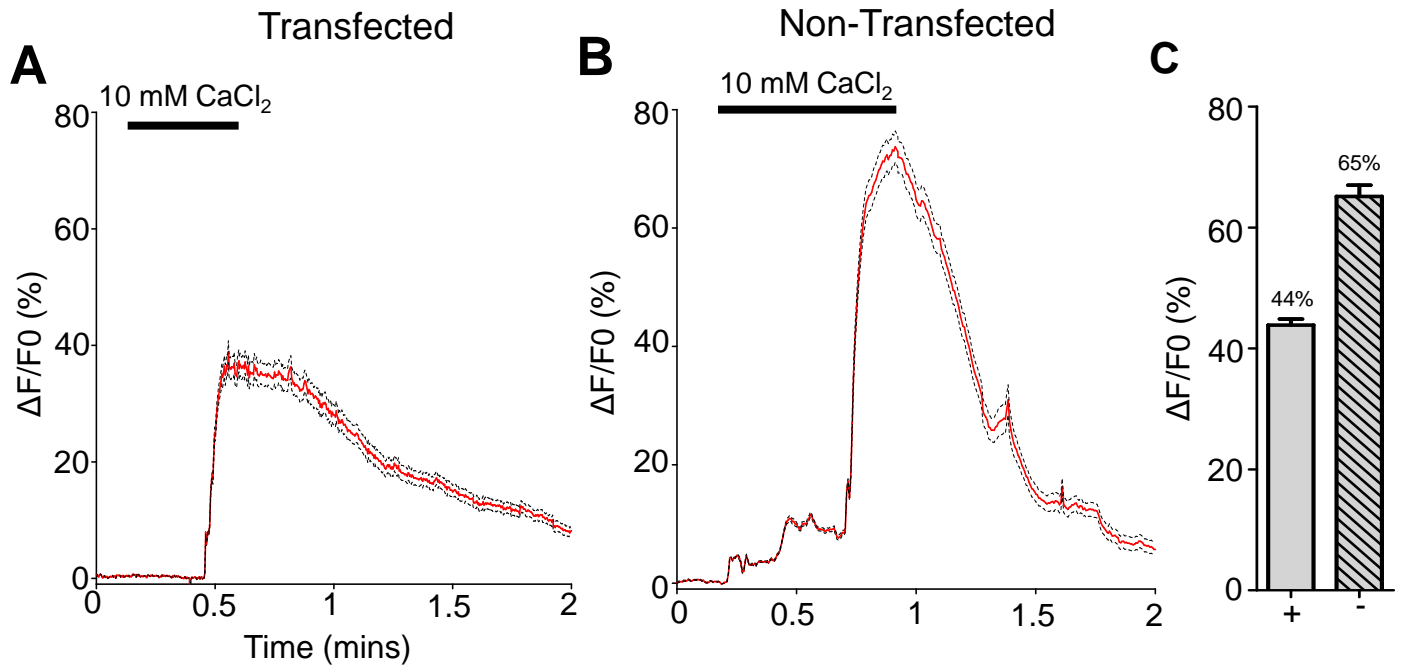

**Supplementary Figure 2:** Control 10 mM  $\text{CaCl}_2$  calcium signals after carbachol and diethylcarbamazine treatment. A) Representative trace of a population of *Bma-trp-2b* transfected HEK293 cells from single recording in response to 10 mM  $\text{CaCl}_2$ . B) Representative trace of a population of non-transfected HEK293 cells from single recording in response to 10 mM  $\text{CaCl}_2$ . Horizontal bars indicate the  $\text{CaCl}_2$  application. Red lines indicate average fluorescence; black dotted lines represent  $\pm \text{SEM}$  for all traces. C) Maximal amplitudes of the  $\text{CaCl}_2$  amplitudes in *Bma-trp-2b* transfected HEK293 cells, 43.9% ( $\pm 1\%$ ) (grey bar) and non-transfected HEK293 cells, 65.2% ( $\pm 1.8\%$ ) (grey hatched bar). *Bma-trp-2b* transfected HEK293  $n = 449$ , non-transfected HEK293  $n = 557$ . All values are represented as means  $\pm \text{SEM}$ .

**FIG. S3**

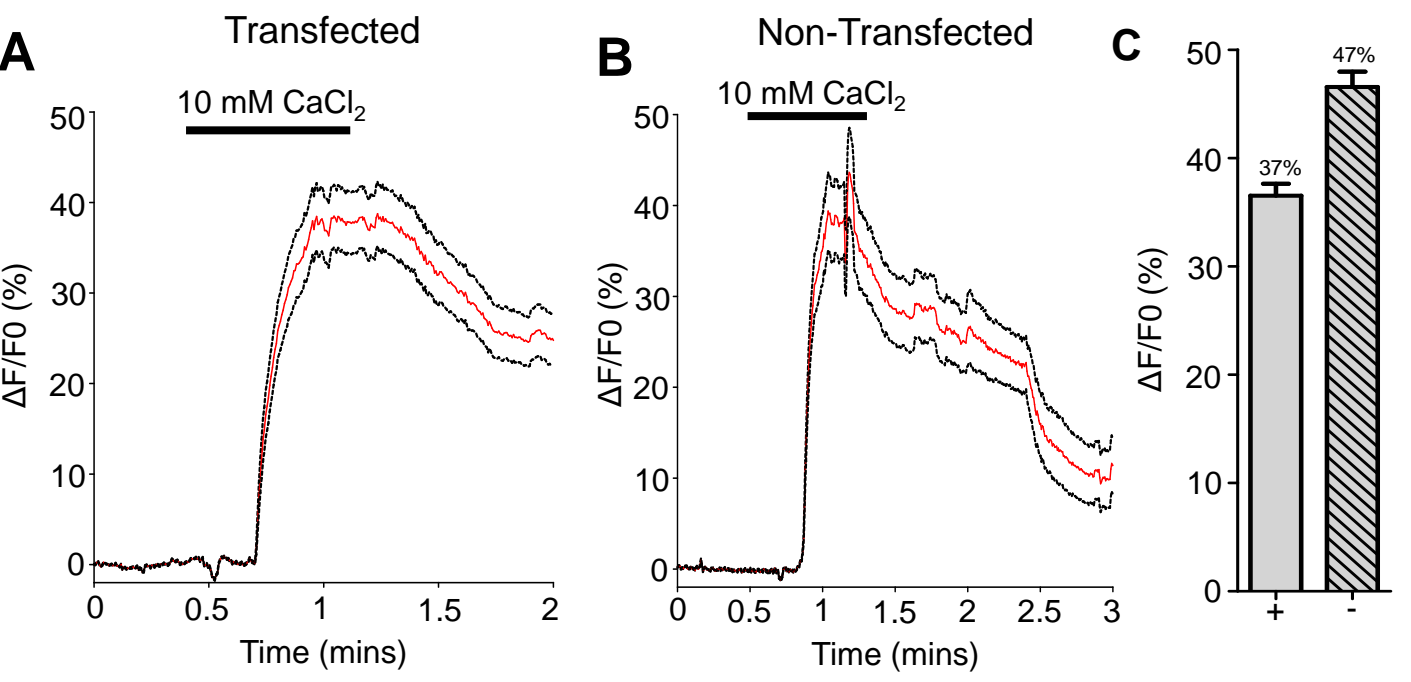

**Supplementary Figure 3:** Control 10 mM  $\text{CaCl}_2$  calcium signals after carbachol and arachidonic acid treatment. A) Representative trace of a population of *Bma-trp-2b* transfected HEK293 cells from single recording in response to 10 mM  $\text{CaCl}_2$ . B) Representative trace of a population of non-transfected HEK293 cells from single recording in response to 10 mM  $\text{CaCl}_2$ . Horizontal bars indicate the  $\text{CaCl}_2$  application. Red lines indicate average fluorescence; black dotted lines represent  $\pm$ SEM for all traces. C) Maximal amplitudes of the  $\text{CaCl}_2$  amplitudes in *Bma-trp-2b* transfected HEK293 cells, 36.5% ( $\pm$  1.1%) (grey bar) and non-transfected HEK293 cells, 46.6% ( $\pm$  1.4%) (grey hatched bar). *Bma-trp-2b* transfected HEK293  $n = 425$ , non-transfected HEK293  $n = 444$ . All values are represented as means  $\pm$  SEM

**FIG. S4**

Transfected

**A**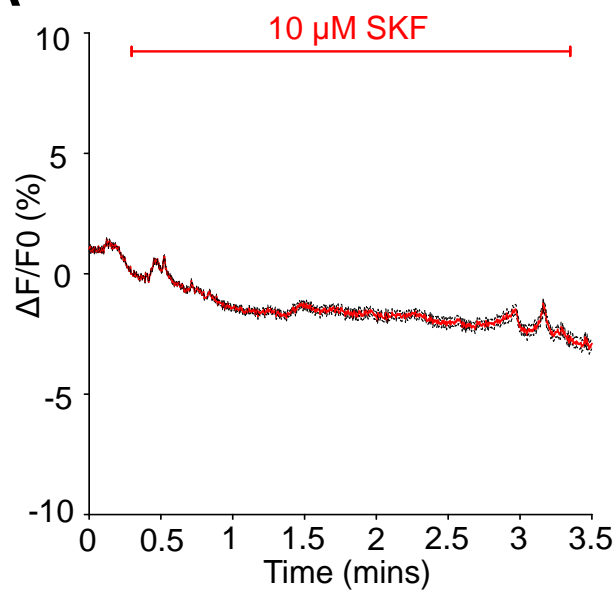

Non-Transfected

**B**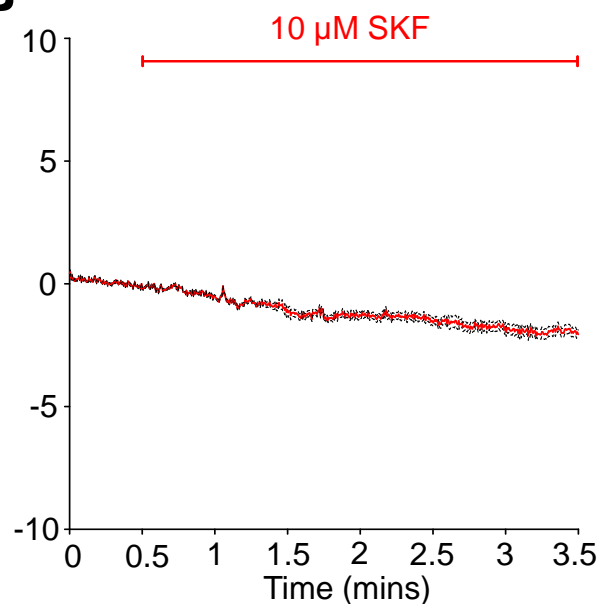**C**

Non-Transfected

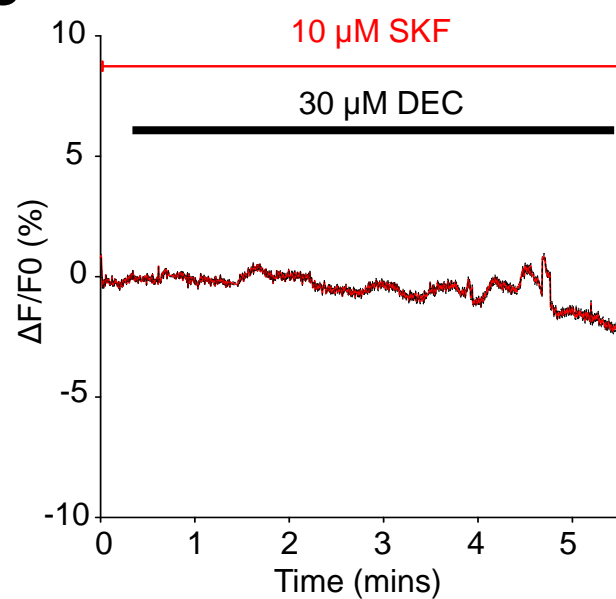**D**

Non-Transfected

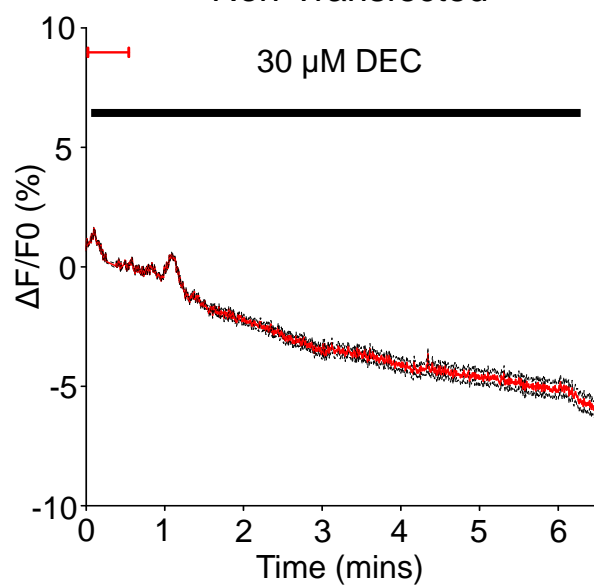**E**

Transfected

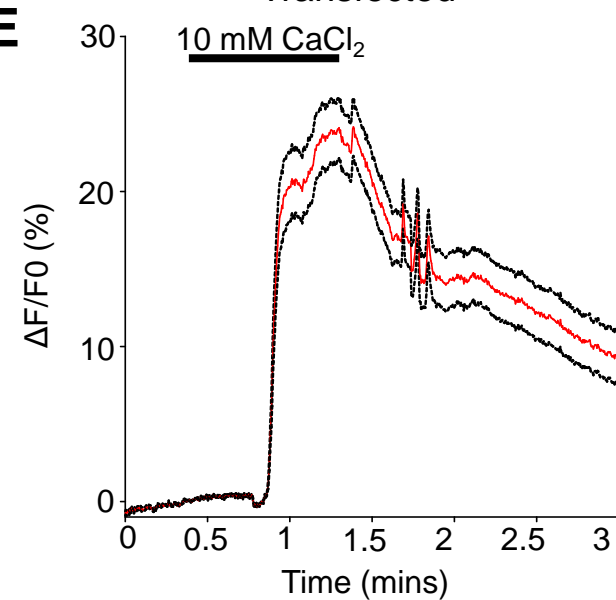**F**

Non-Transfected

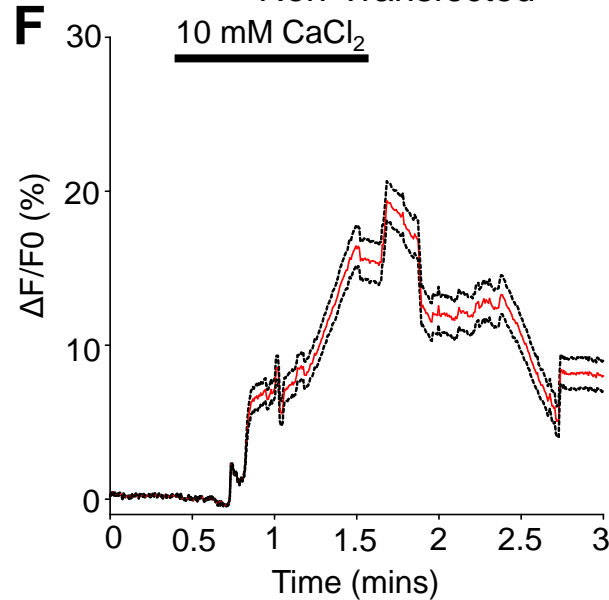

**G**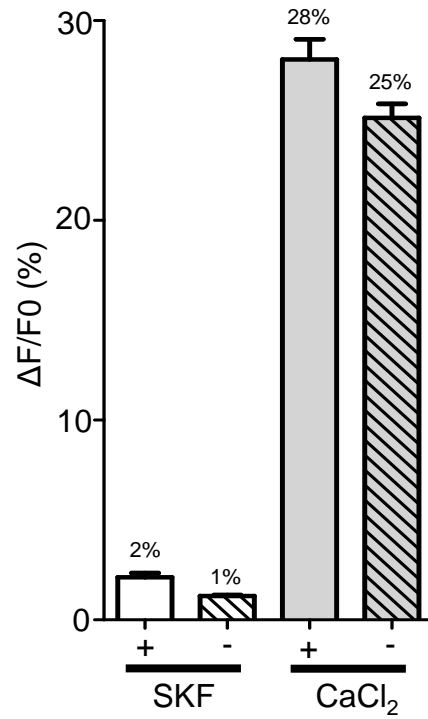

**Supplementary Figure 4: SKF inhibits diethylcarbamazine signaling** A) Representative trace of a population of *Bma-trp-2b* transfected HEK293 cells from single recording in response to 10  $\mu$ M SKF96365 B) Representative trace of a population of non-transfected HEK293 cells from single recording in response to 10  $\mu$ M SKF96365. C) Representative trace of a population of non-transfected HEK293 cells from single recording in response to 10  $\mu$ M SKF96365 + 30  $\mu$ M diethylcarbamazine. D) Representative trace of a population of non-transfected HEK293 cells from single recording in response to 30  $\mu$ M diethylcarbamazine after removal of SKF. E) Representative trace of a population of *Bma-trp-2b* transfected HEK293 cells from single recording in response to 10 mM CaCl<sub>2</sub>. F) Representative trace of a population of non-transfected HEK293 cells from single recording in response to 10 mM CaCl<sub>2</sub>. Horizontal bars indicate the drug applications. Red lines indicate average fluorescence; black dotted lines represent  $\pm$ SEM for all traces. G) Maximal amplitudes of the SKF amplitudes in *Bma-trp-2b* transfected, 2.1% ( $\pm$  0.2%) (white bar) and non-transfected, 1.2% ( $\pm$  0.1%) (hatched bar) and CaCl<sub>2</sub> amplitudes in *Bma-trp-2b* transfected HEK293 cells, 28.1% ( $\pm$  1%) (grey bar) and non-transfected HEK293 cells, 25.1% ( $\pm$  0.7%) (grey hatched bar). *Bma-trp-2b*  $n$  = 11 total recordings, SKF = 39/244 cells, CaCl<sub>2</sub>  $n$  = 244 cells. Non-transfected  $n$  = 10 total recording, SKF = 8/293, CaCl<sub>2</sub>  $n$  = 293 cells. All values are represented as means  $\pm$  SEM
